# Supplementary material
Source: bioRxiv or medRxiv preprint supplement (https://medrxiv.org/highwire/filestream/85766/field_highwire_adjunct_files/0/2020.06.13.20129627-1.pdf)

**Figure S1.** Average standard curves for each of the targets used in this study (IP2, IP4, E, N1 and N2). A. Regression line (solid lines) and their 99% confident (dashed lines). B. Parameters defining each of the curves.

**A**

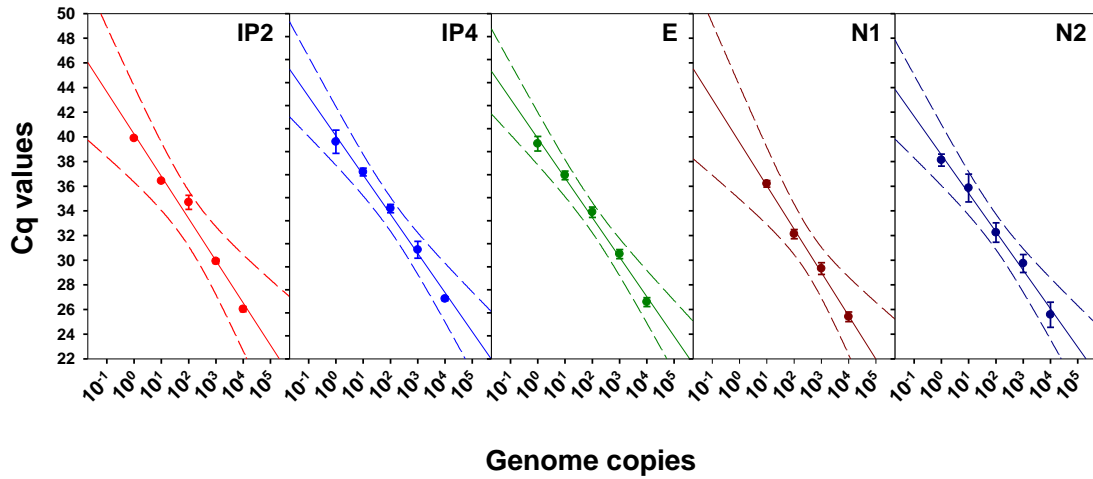

**B**

| TARGET* | SLOPE  | INTERCEPT | EFFICIENCY | R <sup>2</sup> | Percent Replicates Positivity |                               |
|---------|--------|-----------|------------|----------------|-------------------------------|-------------------------------|
|         |        |           |            |                | 10 <sup>1</sup> Genome copies | 10 <sup>0</sup> Genome copies |
| IP2     | -3.421 | 40.228    | 96.0       | 0.981          | 33                            | 33                            |
| IP4     | -3.404 | 39.376    | 96.7       | 0.997          | 67                            | 28                            |
| E       | -3.436 | 39.152    | 95.5       | 0.993          | 100                           | 50                            |
| N1      | -3.513 | 39.543    | 92.6       | 0.995          | 100                           | 0                             |
| N2      | -3.120 | 38.540    | 109.2      | 0.991          | 100                           | 67                            |

\*Following the available protocols, the number of PCR cycles performed was of 50 for IP2 and IP4, and 45 for E, N1 and N2.

**Figure S2.** Levels of SARS-CoV-2 genomes (Cq Values) in six sewage samples employing the five targets (IP2, IP4, E, N1 and N2).

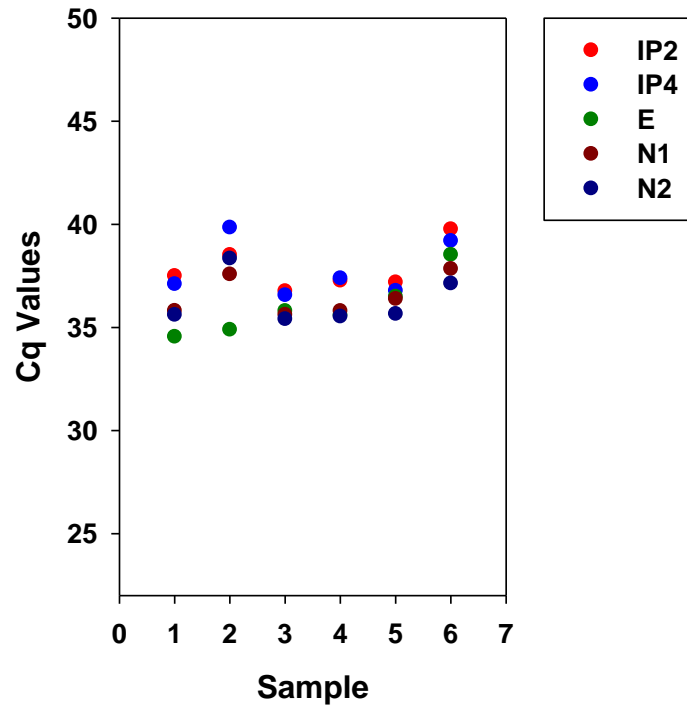

Supplement: Supplementary file [file 2020.06.13.20129627-1.pdf]
